# Supplementary material
Source: PubMed Central journal article supplement (PMC2877256)
Supplement: emm-42-376-s001.pdf [file emm-42-376-s001.pdf]

## Supplemental Data

# Genetic association of angiogenesis- and hypoxia-related gene polymorphisms with osteonecrosis of the femoral head

Jung Min Hong<sup>1,2</sup>, Tae-Ho Kim<sup>1</sup>, Hyun-Ju Kim<sup>1</sup>, Eui-Kyun Park<sup>1,3</sup>, Eun-Kyoung Yang<sup>2,5</sup> and Shin-Yoon Kim<sup>1,4,5</sup>

## Results

To identify genetic factors involved in susceptibility to ONFH, we conducted an association study using SNP chip array data in 460 ONFH patients and 300 controls. Candidate genes were selected from previous microarray reports (Pacicca *et al.*, 2003; Wiczorek *et al.*, 2003; Salim *et al.*, 2004; Tardif *et al.*, 2004; Fang *et al.*, 2005; Hopwood *et al.*, 2005; Zhou *et al.*, 2005). SNPs in these genes were selected based on a call rate (CR) > 0.90, minor allele frequency (MAF) > 0.05, and Hardy-Weinberg equilibrium (HWE) > 0.05 using a public database (<http://www.ncbi.nlm.nih.gov/SNP/>). Total numbers of SNPs found in genes related to angiogenesis (31 genes) and the SNPs selected for genotyping (212 SNPs) are listed in Supplemental Data Table S1.

Among them, our results reveal that 6 candidate genes (TF, KDR, VEGFC, IGFBP3, NRP1 and ACE) are significantly associated with ONFH (Supplemental Data Table S2). SNP IDs, MAF, and HWE of the genotyped SNPs are presented in Supplemental Data Table S2. The genotype distributions between ONFH patients and control groups were compared and applied to the Hardy-Weinberg equilibrium (Supplemental Data Table S2). Each genotype was also analyzed with the use of codominant, dominant, recessive, and allele genetic models. We found significant associations of genotypic and allelic frequencies for several SNPs of candidate genes with ONFH (Table 1). Three SNPs (rs1880669, rs2692695, rs2718806) of the Transferrin (TF) gene showed association with ONFH in the codominant and dominant models ( $P = 0.0049-0.0448$ , OR 1.27-1.69). Two SNPs (rs1485766, rs3775203) of Vascular endothelial growth factor C (VEGFC) were also associated with increased risk of ONFH ( $P = 0.0042-0.0107$ , OR 1.33-1.67). A significant association for three SNPs (rs4309, rs4344, rs4461142) of Angiotensin I converting enzyme (ACE) was also found in the dominant model ( $P = 0.0044-0.0367$ , OR 1.34-1.63). The most significant association with risk of ONFH was identified in a single SNP (rs2453839) of the Insulin-like growth factor binding protein 3 (IGFBP3) gene in the recessive model ( $P = 0.0061$ , OR 7.74) (Table 1). On the other hand,

several SNPs in the Kinase insert domain receptor (*KDR*), *VEGFC*, and Neuropilin 1 (*NRP1*) genes showed a protective effect against ONFH. Two SNPs (rs6837735, rs1870377) of *KDR* were associated with a protective effect against ONFH in the recessive model ( $P = 0.0357$ ,  $0.0488$ , OR  $0.67$ ,  $0.67$ , respectively). SNP rs2333496 of *VEGFC* ( $P = 0.0087$ , OR  $0.55$ ) and three SNPs (rs12573218, rs12358370, rs2269091) of *NRP1* ( $P = 0.0019$ - $0.0423$ , OR  $0.55$ - $0.75$ ) were associated with a reduced risk of ONFH. There were no statistically significant interactions between any other SNPs and ONFH (Table 1).

For further analysis, we classified ONFH cases on the basis of pathological etiology into three subgroups (alcohol-induced, idiopathic, and steroid-induced, Table 2). We found that a significant association was found between SNPs in the *TF* gene and the idiopathic subgroup ( $P = 0.0008$ - $0.0486$ , OR  $1.38$ - $2.37$ ). This result suggests that *TF* gene variations are risk factors for increased susceptibility to idiopathic ONFH. Two SNPs (rs1485766, rs3775203) in the *VEGFC* gene were also associated with the risk of developing ONFH in the alcohol and idiopathic subgroups ( $P = 0.0259$ - $0.0347$ , OR  $1.34$ - $1.59$  and  $P = 0.0010$ - $0.0456$ , OR  $1.38$ - $2.26$ , respectively). In addition, three SNPs (rs4309, rs4344, rs4461142) in *ACE* were associated with susceptibility to ONFH in the steroid subgroup ( $P = 0.0018$ - $0.0037$ , OR  $3.26$ - $3.68$  in the dominant model). However, one SNP (rs6837735) of *KDR* ( $P = 0.0011$ - $0.0107$ , OR  $0.42$ - $0.70$ ) and three SNPs (rs12573218, rs12358370, rs2269091) of *NRP1* ( $P = 0.0112$ - $0.0446$ , OR  $0.49$ - $0.68$ ) had protective effects in the idiopathic subgroup. The most significant association was found in the *IGFBP3* gene. SNP (rs2453839) was significantly associated with alcohol-induced and idiopathic ONFH in the recessive model. The odds ratio of the susceptibility allele was  $6.15$  ( $P = 0.0194$ ) and  $8.67$  ( $P = 0.0066$ ) in the two subgroups, respectively. This result suggests that subjects carrying the minor homozygous allele (CC) of rs2453839 tend to have a higher risk of developing ONFH (Table 2).

We also constructed an LD and performed haplotype analyses based on genotype data of SNPs in the candidate genes. The haplotypes with a MAF  $\geq 5\%$  were observed within an LD block.

There is one LD block in the *TF* gene, three LD blocks in the *KDR* gene, one LD block in the *IGFBP3* gene, five LD blocks in the *NRP1* gene, and two LD blocks in the *ACE* gene (Supplemental Data Figure S1A-F). Several haplotypes were found to be associated with ONFH (Table 3).

Subjects carrying the *KDR*-ht6 allele (42%) had a higher risk of ONFH than those not carrying the *KDR*-ht6 allele (35%) ( $P = 0.146$ , OR  $1.32$ ). However, *TF*-ht2 ( $P = 0.0151$ , OR  $0.72$ ) and *KDR*-ht10 ( $P = 0.0026$ , OR  $0.52$ ) were associated with a reduced risk of ONFH, which was not predicted by individual SNP analyses. *NRP1*-ht16 was also related to a decreased ONFH risk ( $P = 0.0118$ , OR  $0.67$ ). There were no significant differences in candidate genes between the other haplotypes and ONFH (Table 3).

## Methods

### Candidate gene and SNP selection

To identify genetic factors associated with the risk of ONFH, we examined previous microarray data from bone marrow cells in hypoxic conditions. Normal and human mesenchymal stem cells (hMSC) were prepared from femoral tissue from osteoarthritis, osteoarthritic human chondrocytes, and the femur fracture in rat. Human and mouse bone marrow-derived MSCs from normoxic and hypoxic conditions were also used (Pacicca *et al.*, 2003; Wieczorek *et al.*, 2003; Salim *et al.*, 2004; Tardif *et al.*, 2004; Fang *et al.*, 2005; Hopwood *et al.*, 2005; Zhou *et al.*, 2005).

For this study, we chose candidate genes associated with angiogenesis, lipid metabolism, oxidative stress, and hypoxia, the major pathogenic conditions of ONFH, on the basis of their known biological function and supportive literature. Approximately 3,000 SNPs for genotyping candidate genes were obtained from public databases (dbSNP, KSNP, HapMap) for verification. We primarily tested for SNPs in candidate genes known to regulate angiogenesis by hypoxia (Supplemental Data Table S1).

### Figure S1. Linkage disequilibrium (D') among SNPs in candidate gene.

Pairwise LD diagrams between SNP markers are shown, as calculated by Haploview software (<http://www.broad.mit.edu/mpg/haploview/>). Red denotes complete LD ( $r^2=1$ ), Pink denotes intermediated LD ( $0 < r^2 < 1$ ), white denotes no LD ( $r^2=0$ ). LD Blocks represent a region of strong LD between polymorphisms. A-E. LD among TF, IGFBP3, KDR, NRP1 and ACE SNPs.

#### A. LD among TF polymorphisms

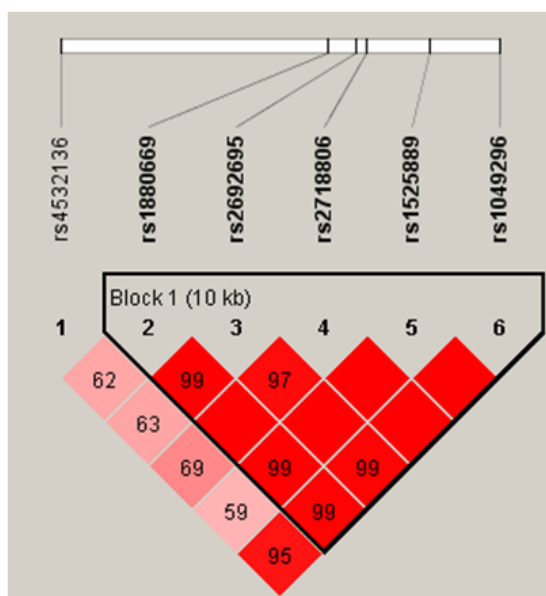

#### B. LD among IGFBP3 polymorphisms

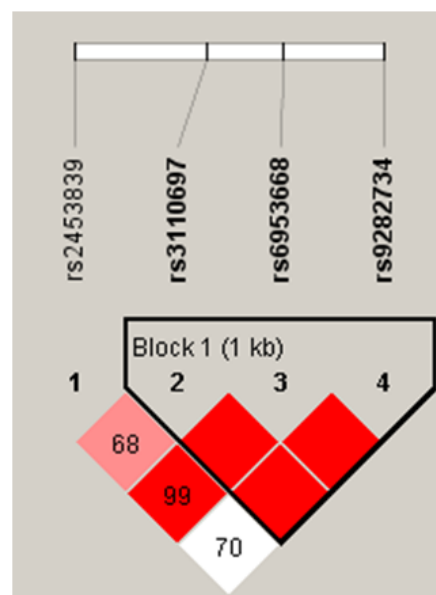

### C. LD among KDR SNPs

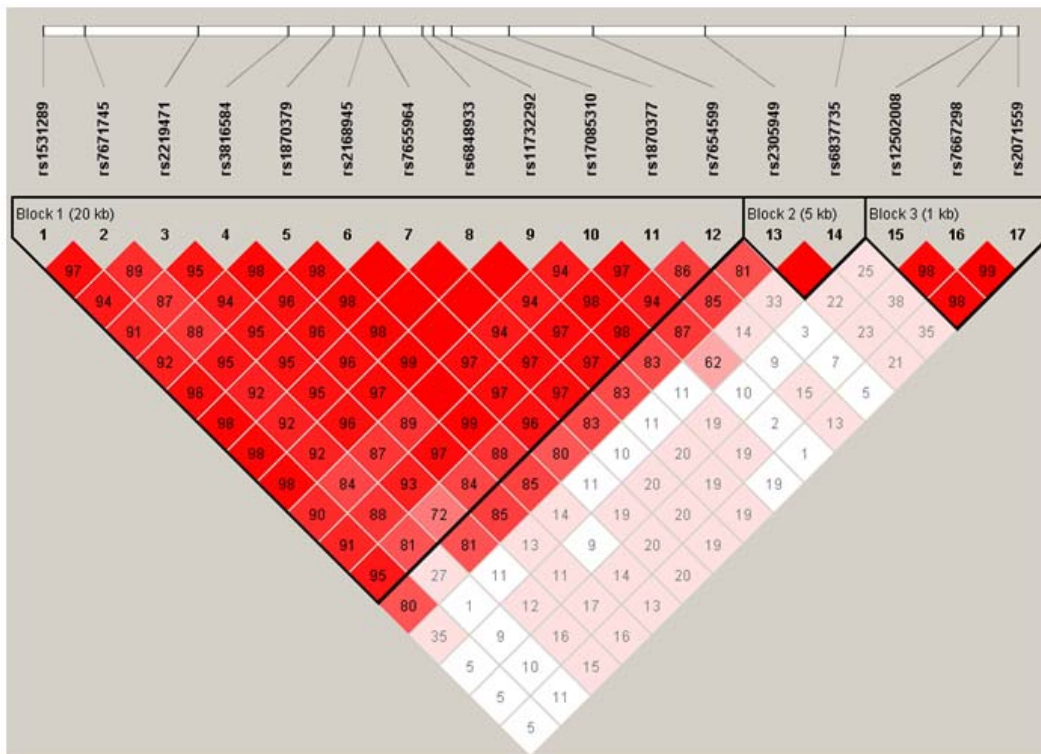

### D. LD among NRP1 SNPs

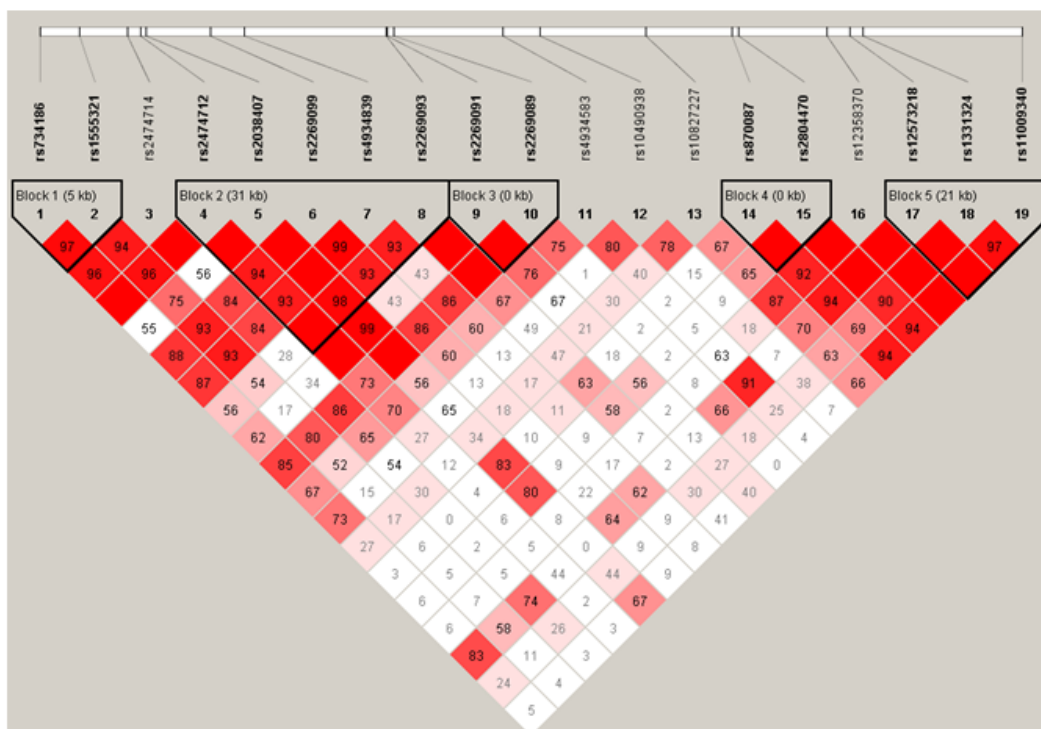

## E. LD among ACE SNPs

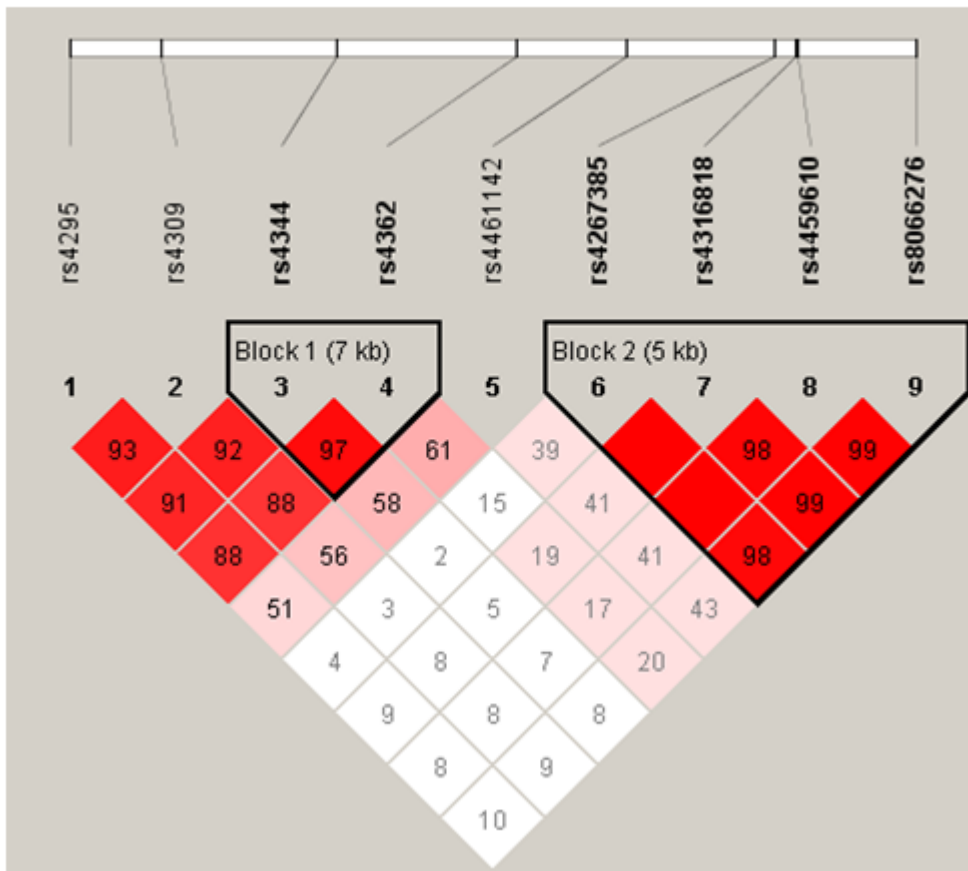

**Table S1. List of candidate genes and SNPs.**

| Chromosome | Gene name | Putative function                 | SNPs | Selected SNPs |
|------------|-----------|-----------------------------------|------|---------------|
| 1          | UTS2      | Blood pressure regulation         | 4    | 4             |
|            | MTHFR     | Angiogenesis                      | 15   | 11            |
|            | SELP      | Platelet activation/Degranulation | 9    | 5             |
| 3          | ITGB5     | Angiogenesis                      | 17   | 12            |
|            | TF        | Iron metabolism                   | 12   | 6             |
|            | PTX3      | Thrombogenesis/Immune signaling   | 3    | 3             |
| 4          | KDR       | Angiogenesis                      | 24   | 17            |
|            | FGF5      | Growth factor/Cytokine            | 9    | 7             |
|            | ANXA5     | Blood coagulation                 | 15   | 11            |
|            | FGF2      | Growth factor/Cytokine            | 6    | 6             |
|            | FGB       | Platelet activation               | 8    | 2             |
|            | VEGFC     | Growth factor/Cytokine            | 6    | 5             |
| 5          | FGF1      | Growth factor/Cytokine            | 4    | 4             |
| 6          | EDN1      | Growth factor/Cytokine            | 2    | 1             |
|            | VEGF      | Angiogenesis                      | 19   | 17            |
|            | PLG       | Blood coagulation                 | 1    | 1             |
| 7          | IGFBP3    | Growth factor/cytokine            | 4    | 4             |
|            | EPO       | Erythropoiesis                    | 1    | 0             |
| 10         | ITGB1     | Angiogenesis                      | 13   | 13            |
|            | NRP1      | Angiogenesis                      | 24   | 19            |
|            | FGFR2     | Growth factor/Cytokine            | 2    | 1             |
| 11         | ADM       | Growth factor/Cytokine            | 2    | 0             |
| 13         | FLT1      | Angiogenesis                      | 26   | 23            |
| 15         | THBS1     | Angiogenesis                      | 8    | 6             |
| 16         | VKORC1    | Angiogenesis                      | 4    | 4             |
| 17         | ALOX12    | Iron metabolism                   | 4    | 3             |
|            | VTN       | Atherogenesis/Thrombus formation  | 2    | 1             |
|            | IGFBP4    | Growth factor/Cytokine            | 3    | 3             |
|            | ITGB3     | Angiogenesis                      | 12   | 11            |
|            | ACE       | Blood pressure regulation         | 15   | 9             |
|            | PECAM1    | Adhesion                          | 7    | 3             |

**Table S2. Selected candidate gene SNP and allele frequency.**

| Chr       | Gene   | SNP rs ID  | Position | Major/<br>Minor allele | Allelic Frequency <sup>a</sup> |         | HWE <sup>b</sup> |
|-----------|--------|------------|----------|------------------------|--------------------------------|---------|------------------|
|           |        |            |          |                        | Case                           | Control |                  |
| 3         | TF     | rs4532136  | Intron1  | G/A                    | 0.329                          | 0.224   | 0.481            |
|           | TF     | rs1880669  | Intron10 | T/C                    | 0.829                          | 0.461   | 0.262            |
|           | TF     | rs2692695  | Intron12 | A/G                    | 0.898                          | 0.481   | 0.388            |
|           | TF     | rs2718806  | Intron12 | G/A                    | 0.094                          | 0.059   | 1.000            |
|           | TF     | rs1525889  | Intron14 | A/C                    | 0.635                          | 0.397   | 0.704            |
|           | TF     | rs1049296  | Exon15   | C/T                    | 0.299                          | 0.278   | 0.542            |
| 4         | KDR    | rs2071559  | Promoter | A/G                    | 0.480                          | 0.307   | 1.000            |
|           | KDR    | rs7667298  | Exon1    | C/T                    | 0.439                          | 0.305   | 0.889            |
|           | KDR    | rs12502008 | Intron1  | T/G                    | 0.552                          | 0.397   | 1.000            |
|           | KDR    | rs6837735  | Intron2  | C/T                    | 0.691                          | 0.498   | 0.898            |
|           | KDR    | rs2305949  | Intron5  | C/T                    | 0.155                          | 0.149   | 0.814            |
|           | KDR    | rs7654599  | Intron9  | T/C                    | 0.286                          | 0.230   | 0.390            |
|           | KDR    | rs1870377  | Exon11   | T/A                    | 0.618                          | 0.429   | 0.173            |
|           | KDR    | rs17085310 | Intron13 | G/A                    | 0.126                          | 0.144   | 0.622            |
|           | KDR    | rs11732292 | Intron13 | A/C                    | 0.541                          | 0.349   | 0.591            |
|           | KDR    | rs6848933  | Intron13 | C/G                    | 0.545                          | 0.352   | 0.508            |
|           | KDR    | rs7655964  | Intron15 | A/C                    | 0.547                          | 0.354   | 0.504            |
|           | KDR    | rs2168945  | Intron15 | A/C                    | 0.545                          | 0.348   | 0.282            |
|           | KDR    | rs1870379  | Intron15 | A/C                    | 0.592                          | 0.417   | 0.212            |
|           | KDR    | rs3816584  | Intron16 | A/G                    | 0.604                          | 0.419   | 0.137            |
|           | KDR    | rs2219471  | Intron20 | T/C                    | 0.621                          | 0.421   | 0.264            |
|           | KDR    | rs7671745  | Intron22 | G/A                    | 0.333                          | 0.285   | 1.000            |
|           | KDR    | rs1531289  | Intron25 | C/T                    | 0.223                          | 0.192   | 0.246            |
|           | VEGFC  | rs2333496  | Intron4  | T/C                    | 0.478                          | 0.384   | 0.096            |
| rs1485766 |        | Intron4    | G/T      | 0.887                  | 0.462                          | 0.904   |                  |
| rs3775203 |        | Intron4    | T/G      | 0.844                  | 0.452                          | 0.541   |                  |
| rs3775202 |        | Intron4    | T/C      | 0.642                  | 0.398                          | 0.892   |                  |
| rs3775194 |        | Intron4    | G/C      | 0.147                  | 0.124                          | 0.777   |                  |
| 7         | IGFBP3 | rs9282734  | Exon2    | T/G                    | 0.103                          | 0.092   | 1.000            |
|           | IGFBP3 | rs3110697  | Intron3  | G/A                    | 0.345                          | 0.258   | 0.053            |
|           | IGFBP3 | rs6953668  | Intron3  | G/A                    | 0.098                          | 0.092   | 1.000            |
|           | IGFBP3 | rs2453839  | Intron4  | T/C                    | 0.234                          | 0.151   | 0.055            |
| 10        | NRP1   | rs11009340 | Intron2  | G/T                    | 0.359                          | 0.248   | 0.139            |
|           | NRP1   | rs1331324  | Intron2  | G/C                    | 0.702                          | 0.470   | 0.388            |

|       |            |           |          |       |       |       |       |
|-------|------------|-----------|----------|-------|-------|-------|-------|
| NRP1  | rs12573218 | Intron2   | C/T      | 0.156 | 0.195 | 0.097 |       |
| NRP1  | rs12358370 | Intron2   | C/G      | 0.052 | 0.081 | 0.682 |       |
| NRP1  | rs2804470  | Intron2   | A/G      | 0.384 | 0.262 | 0.209 |       |
| NRP1  | rs870087   | Intron2   | T/C      | 0.449 | 0.288 | 0.369 |       |
| NRP1  | rs10827227 | Intron2   | T/C      | 0.744 | 0.441 | 0.899 |       |
| NRP1  | rs10490938 | Intron4   | C/T      | 0.115 | 0.112 | 0.547 |       |
| NRP1  | rs4934583  | Intron5   | A/G      | 0.297 | 0.215 | 0.370 |       |
| NRP1  | rs2269089  | Intron6   | G/C      | 0.779 | 0.483 | 0.112 |       |
| NRP1  | rs2269091  | Intron6   | G/T      | 0.188 | 0.203 | 0.576 |       |
| NRP1  | rs2269093  | Intron6   | A/G      | 0.135 | 0.148 | 1.000 |       |
| NRP1  | rs2229934  | Exon8     | A/G      | 0.532 | 0.339 | 0.419 |       |
| NRP1  | rs2269099  | Intron8   | C/T      | 0.537 | 0.338 | 0.341 |       |
| NRP1  | rs2038407  | Intron9   | A/T      | 0.099 | 0.115 | 0.769 |       |
| NRP1  | rs2474712  | Intron9   | T/C      | 0.177 | 0.130 | 0.096 |       |
| NRP1  | rs2474714  | Intron10  | G/A      | 0.271 | 0.231 | 0.870 |       |
| NRP1  | rs1555321  | Intron11  | A/G      | 0.578 | 0.375 | 0.596 |       |
| NRP1  | rs734186   | 3'UTR     | A/G      | 0.252 | 0.207 | 0.355 |       |
| <hr/> |            |           |          |       |       |       |       |
| ACE   | rs4295     | Intron2   | C/G      | 0.698 | 0.410 | 0.315 |       |
| ACE   | rs4309     | Exon8     | T/C      | 0.714 | 0.404 | 0.391 |       |
| ACE   | rs4344     | Intron17  | A/G      | 0.666 | 0.399 | 0.442 |       |
| ACE   | rs4362     | Exon23    | C/T      | 0.730 | 0.421 | 0.704 |       |
| 17    | ACE        | rs4461142 | Intron26 | C/T   | 0.766 | 0.411 | 1.000 |
| ACE   | rs4267385  | Intron26  | C/T      | 0.265 | 0.242 | 1.000 |       |
| ACE   | rs4316818  | Exon26    | T/C      | 0.285 | 0.249 | 1.000 |       |
| ACE   | rs4459610  | Exon26    | A/T      | 0.293 | 0.254 | 1.000 |       |
| ACE   | rs8066276  | Intron35  | T/C      | 0.282 | 0.240 | 0.873 |       |

<sup>a</sup>Frequencies of minor alleles.

<sup>b</sup>*p*-values of deviation from Hardy-Weinberg equilibrium among ONFH cases and controls.
